# Supplementary material for: Highly Efficient Removal of Uranium from an Aqueous Solution by a Novel Phosphonic Acid-Functionalized Magnetic Microsphere Adsorbent
Source: MDPI journal article supplement (doi:10.3390/ijms232416227), 2022-12-19
Supplement: s1 [file s1]

# Highly Efficient Removal of Uranium from an Aqueous Solution by a Novel Phosphonic Acid-Functionalized Magnetic Microsphere Adsorbent

Jizhou Zhao, Peng Lu, Tengteng He, Jing Huang, Shiao Zhang, Yan Liu, Yun Wang, Cheng Meng and Dingzhong Yuan \*

Jiangxi Province Key Laboratory of Polymer Micro/Nano Manufacturing and Devices, East China University of Technology, Nanchang 330013, China

\* Correspondence: 201060026@ecut.edu.cn

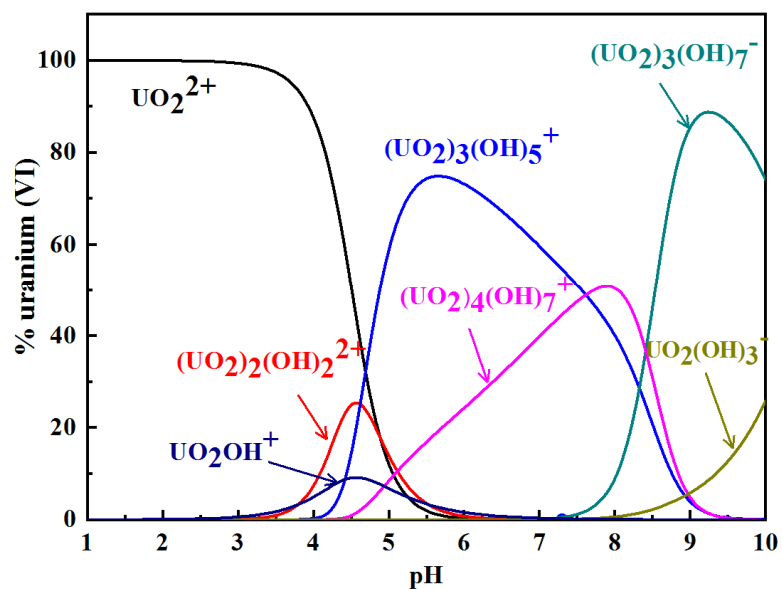

**Figure S1.** Distribution of uranium (VI) species in aqueous solution with a total concentration of 100 mg L<sup>-1</sup> and pH values ranging from 1 to 10. Calculated by using a Medusa program.

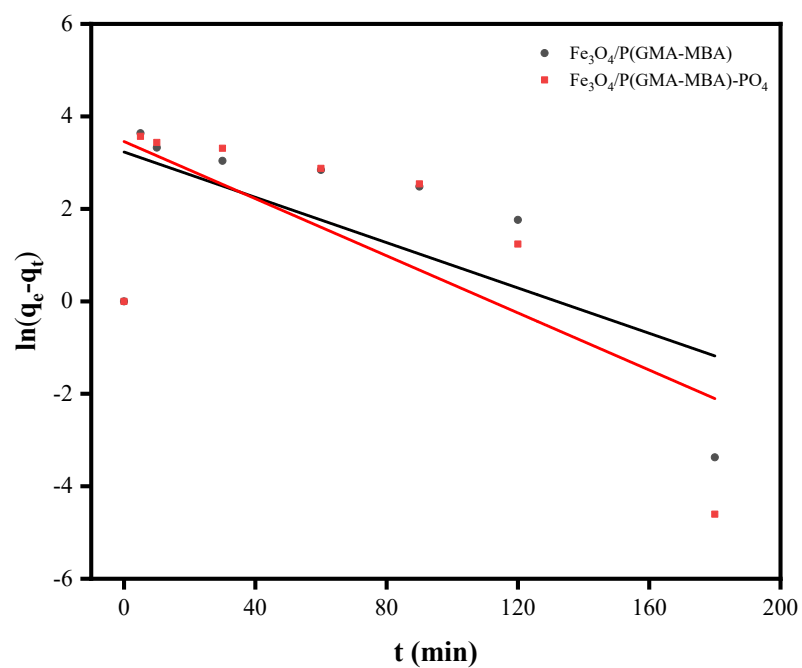

**Figure S2.** Pseudo-first-order model.

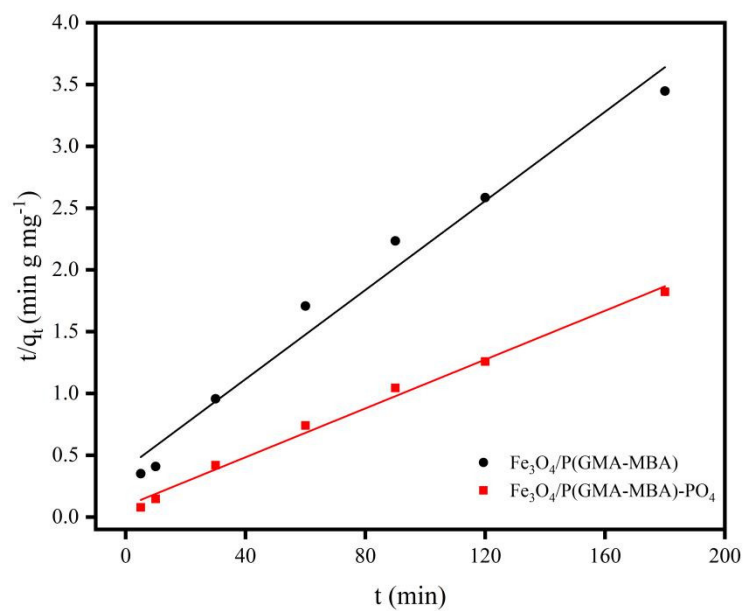

**Figure S3.** Pseudo-second-order model.

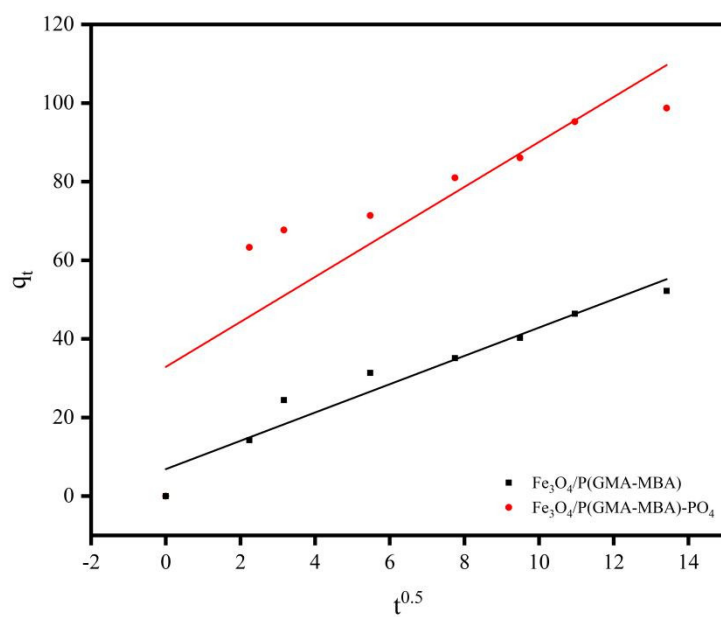

**Figure S4.** Intra-particle diffusion model.

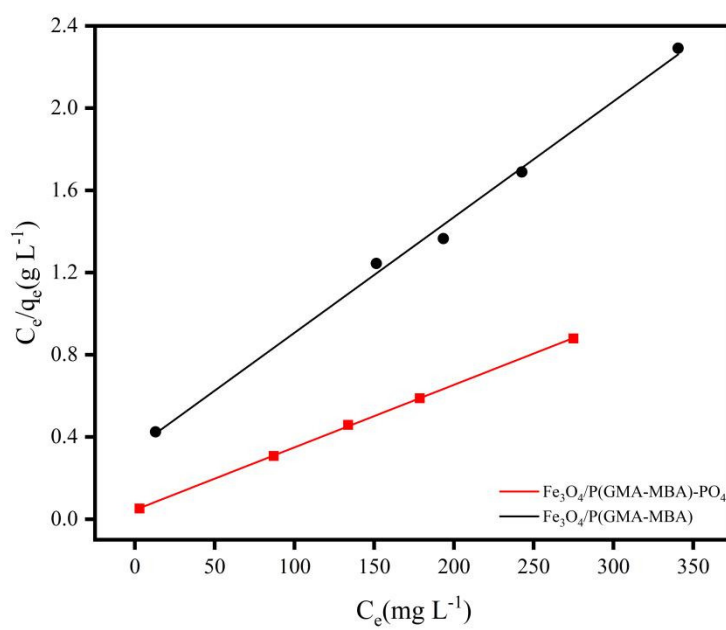

**Figure S5.** Langmuir modal.

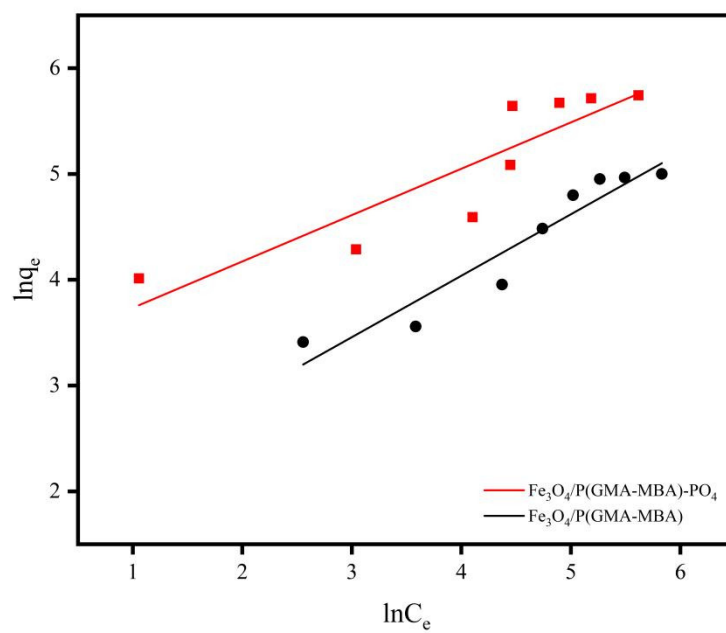

**Figure S6.** Freundlich modal.

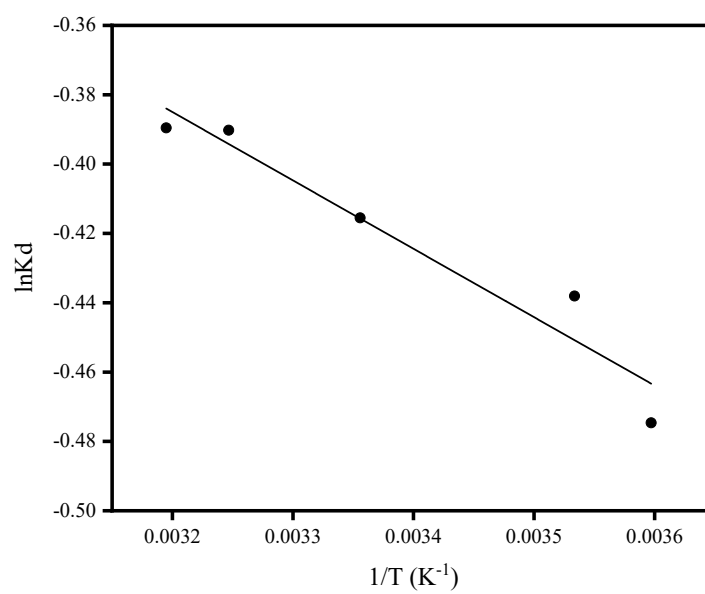

**Figure S7.** Thermodynamic image of U (VI) adsorbed by  $\text{Fe}_3\text{O}_4/\text{P}(\text{GMA-MBA})$ .

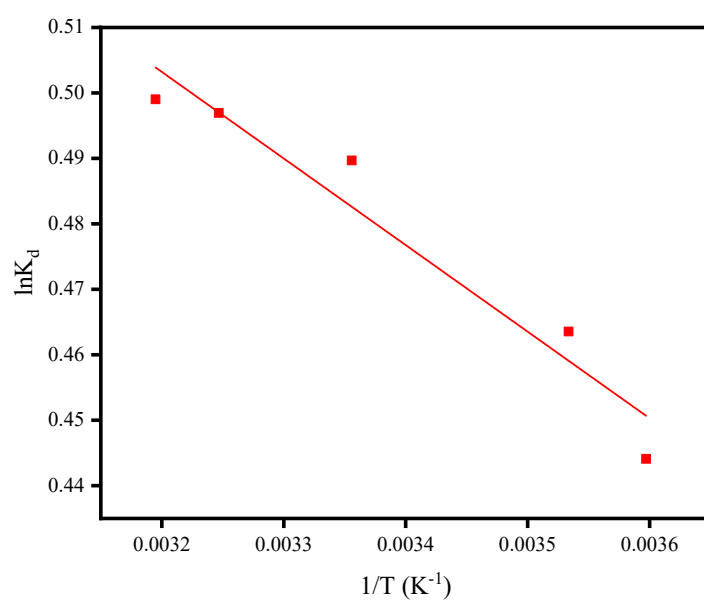

**Figure S8.** Thermodynamic image of U (VI) adsorbed by  $\text{Fe}_3\text{O}_4/\text{P}(\text{GMA-MBA})\text{-PO}_4$

**Table S1.** Related kinetic parameters of uranium (VI) adsorption by  $\text{Fe}_3\text{O}_4/\text{P}(\text{GMA-MBA})$  and  $\text{Fe}_3\text{O}_4/\text{P}(\text{GMA-MBA})\text{-PO}_4$ .

| Kinetic model           | Parameter                                             | $\text{Fe}_3\text{O}_4/\text{P}(\text{GMA-MBA})$ |                                                              |
|-------------------------|-------------------------------------------------------|--------------------------------------------------|--------------------------------------------------------------|
|                         |                                                       |                                                  | $\text{Fe}_3\text{O}_4/\text{P}(\text{GMA-MBA})\text{-PO}_4$ |
| Pseudo-first-order      | $k_1$ (1 sec <sup>-1</sup> )                          | 0.0245                                           | 0.0309                                                       |
|                         | $q_{e, \text{cal}}$ (mg g <sup>-1</sup> )             | 20.28                                            | 31.70                                                        |
|                         | $R^2$                                                 | 0.4478                                           | 0.5121                                                       |
| Pseudo-second-order     | $k_2$ [g (mg <sup>-1</sup> sec <sup>-1</sup> )]       | 0.0012                                           | 0.0011                                                       |
|                         | $q_{e, \text{cal}}$ (mg g <sup>-1</sup> )             | 52.91                                            | 101.21                                                       |
|                         | $R^2$                                                 | 0.9729                                           | 0.9931                                                       |
| Intraparticle diffusion | $K_{int}$ [mg (g <sup>-1</sup> sec <sup>-1/2</sup> )] | 3.6017                                           | 5.7234                                                       |
|                         | $c$ (mg g <sup>-1</sup> )                             | 6.8808                                           | 32.894                                                       |
|                         | $R^2$                                                 | 0.9430                                           | 0.7266                                                       |

**Table S2.**  $\text{Fe}_3\text{O}_4/\text{P}(\text{GMA-MBA})$  and  $\text{Fe}_3\text{O}_4/\text{P}(\text{GMA-MBA})\text{-PO}_4$  adsorption isotherm parameters for uranium.

| Model      | Parameter                                   | $\text{Fe}_3\text{O}_4/\text{P}(\text{GMA-MBA})$ | $\text{Fe}_3\text{O}_4/\text{P}$ |
|------------|---------------------------------------------|--------------------------------------------------|----------------------------------|
|            |                                             |                                                  | $(\text{GMA-MBA})\text{-PO}_4$   |
| Langmuir   | $b \text{ (L mg}^{-1}\text{)}$              | 0.016                                            | 0.066                            |
|            | $q_{\text{max}} \text{ (mg g}^{-1}\text{)}$ | 178.57                                           | 333.33                           |
|            | $R^2$                                       | 0.995                                            | 0.9982                           |
|            | $K_F \text{ (mg g}^{-1}\text{)}$            | 5.77                                             | 27.042                           |
| Freundlich | $n_F$                                       | 1.72                                             | 2.28                             |
|            | $R^2$                                       | 0.9125                                           | 0.8051                           |



**Table S3.** Thermodynamic parameters of Uranium adsorption by Fe<sub>3</sub>O<sub>4</sub>/P(GMA-MBA) and Fe<sub>3</sub>O<sub>4</sub>/P(GMA-MBA)-PO<sub>4</sub>

| Absorbent                                                  | $\Delta H^\circ$    | $\Delta S^\circ$ (J |                                          |       |       |       |       |
|------------------------------------------------------------|---------------------|---------------------|------------------------------------------|-------|-------|-------|-------|
|                                                            | (KJ                 | mol <sup>-1</sup>   | $\Delta G^\circ$ (KJ mol <sup>-1</sup> ) |       |       |       |       |
|                                                            | mol <sup>-1</sup> ) | K <sup>-1</sup> )   |                                          |       |       |       |       |
| Fe <sub>3</sub> O <sub>4</sub> /P(GMA-MBA)                 | 1.640               | 2.048               | 278K                                     | 283 K | 298 K | 308 K | 313 K |
|                                                            |                     |                     | -0.57                                    | -0.58 | -0.61 | -0.63 | -0.64 |
| Fe <sub>3</sub> O <sub>4</sub> /P(GMA-MBA)-PO <sub>4</sub> | 4.514               | 7.702               | -1.04                                    | -1.12 | -1.20 | -1.28 | -1.35 |

$$\ln K^\circ = \frac{\Delta S^\circ}{R} - \frac{\Delta H^\circ}{RT} \quad \text{Equation (S1)}$$

$$\Delta G^\circ = \Delta H^\circ - T\Delta S^\circ \quad \text{Equation (S2)}$$

where  $\Delta H^\circ$ ,  $\Delta S^\circ$ , and  $\Delta G^\circ$  stands for the enthalpy (KJ mol<sup>-1</sup>), entropy (J mol<sup>-1</sup> K<sup>-1</sup>) and Gibbs free energy (KJ mol<sup>-1</sup>).  $K^\circ$  is the sorption equilibrium constant (mL g<sup>-1</sup>).
